# Supplementary material for: Diversity and composition of volant and non-volant small mammals in northern Selangor State Park and adjacent forest of Peninsular Malaysia
Source: Biodivers Data J. 2020 Apr 7;8:e50304. doi: 10.3897/BDJ.8.e50304 (PMC7156494; doi:10.3897/BDJ.8.e50304)
Supplement: Supplementary material 1 — Comparison of small mammals diversity in Selangor State Park, Taman Negara National Park, Royal Belum State Park, Endau-Rompin State Park and Hulu Terengganu [file bdj-08-e50304-s001.xlsx]

## Sheet: Sheet1
No	Group	Family	Species	Selangor State Park	Taman Negara National Park (Kuala Atok and Kuala Tahan)	Royal Belum, Perak	Endau-Rompin State Park	Hulu Terengganu, Terengganu
1	Non-volant	Erinaceidae	Echinosorex gymnura	1	1	1	1	0
2			Hylomys suillus	1	1	1	1	0
3		Muridae	Bandicota indica	1	0	0	0	0
4			Berylmys bowersi	1	1	1	1	0
5			Chiropodamys gliroides	1	1	1	1	0
6			Lenothris canus	1	0	0	1	0
7			Leopoldamys sabanus	1	1	1	1	1
8			Maxomys rajah	1	1	1	1	1
9			Maxomys surifer	1	1	1	1	1
10			Maxomys whiteheadi	1	1	1	1	1
11			Mus musculus	0	0	0	1	0
12			Niviventer cremoriventer	1	1	0	1	1
13			Niviventer cremoriventer	0	0	1	0	0
14			Pithecheir parvus	1	0	0	1	0
15			Rattus annandalei	0	1	0	1	1
16			Rattus argentiventer	0	1	0	1	0
17			Rattus exulans	1	1	1	1	1
18			Rattus rattus	1	1	1	1	0
19			Rattus tiomanicus	1	1	1	1	1
20			Sundamys muelleri	1	1	1	1	1
21		Sciuridae	Callosciurus caniceps	1	1	0	0	1
22			Callosciurus erythraeus	0	0	1	0	0
23			Callosciurus nigrovittatus	1	1	1	1	0
24			Callosciurus notatus	1	1	1	1	1
25			Callosciurus presvostii	1	0	1	1	1
26			Lariscus insignis	1	1	1	1	1
27			Ratufa affinis	1	0	1	1	0
28			Ratufa bicolor	1	0	1	1	1
29			Rhinosciurus laticaudatus	1	1	1	1	0
30			Sundasciurus hippurus	1	0	0	1	0
31			Sundasciurus lowii	1	1	1	1	0
32			Sundasciurus tenuis	1	1	1	1	1
33			Tamiops macclellandii		0	1
34		Soricidae	Chimarogale himalayica	1	0	1	0	0
35			Crocidura fuliginosa	1	1	1	0	0
36			Crocidura malayana	1	0	0	1	0
37			Crocidura monticola	1	0	0	0	0
38			Crocidura negligens	0	0	0	1	0
39			Suncus etruscus	1	0	1	0	0
40			Suncus murinus	0	1	0	1	0
41		Tupaiidae	Ptilocercus lowii	1	0	1	1	0
42			Tupaia glis	1	1	1	1	1
43			Tupaia minor	1	1	1	1	0
44		Pteromyidae	Aeromys tehphromelas	1	1	0	1	0
45			Hylopetes platyurus	0	1	1	1	0
46			Hylopetes spadiceus	1	0	0	1	0
47			Iomys horsefieldii	1	1	1	1	0
48			Petaurista elegans	0	0	0	1	0
49			Petaurista petaurista	1	1	1	1	0
50			Petinomys setosus	1	0	0	0	0
51			Pteromyscus pulverulentus	1	1	0	0	0
53		Spalacidae	Rhizomys sumatrensis	1	1	1	0	0
55	Volant	Hipposideridae	Coelops frithii	1	0	0	1	0
56			Coelops robinsoni	0	0	0	0	1
57			Hipposideros armiger	1	0	0	1	1
58			Hipposideros ater	0	0	0	1	0
59			Hipposideros atrox	1	0	0	0	0
60			Hipposideros bicolor	1	1	1	1	1
61			Hipposideros cervinus	1	1	0	1	1
62			Hipposideros cineraceus	1	0	1	1	1
63			Hipposideros diadema	1	1	1	1	1
64			Hipposideros doriae	0	0	0	1	0
65			Hipposideros galeritus	1	1	1	1	1
66			Hipposideros larvatus	1	1	0	1	1
67			Hipposideros redleyii	1	1	0	1	1
68			Hipposideros sabanus	1	0	0	0	0
69			Hippososideros dyacorum	0	0	0	0	1
70		Nycteridae	Nycteris javanica	1	0	1	0	0
71			Nycteris tragata	1	1	1	1	1
72		Pteropodidae	Aethalops alepto	0	0	0	1	0
73			Balionycteris maculata	1	1	1	1	1
74			Chironax melanocephalus	1	1	1	1	1
75			Cynopterus brachyotis cf Forest	1	1	1	1	1
76			Cynopterus brachyotis	1	1	1	1	1
78			Cynopterus horsfieldii	1	1	1	1	1
79			Cynopterus sphinx	0	0	0	0	1
80			Dyacopterus spadiceus	1	0	1	0	0
81			Eonycteris spelaea	1	0	1	0	1
82			Macroglossus lagochilus	1	0	0	0	0
83			Macroglossus minimus	1	1	1	1	1
84			Macroglossus sobrinus	1	1	0	1	1
85			Megaerops ecaudatus	1	0	1	1	1
86			Megaerops wetmorei	0	0	0	1	0
87			Penthetor lucasi	1	1	1	1	1
88			Pteropus vampyrus	1	0	0	1	0
89			Rousettus amplexicaudatus	1	0	0	1	1
90		Rhinolophidae	Rhinolophus acuminatus	1	0	1	1	0
91			Rhinolophus affinis	1	1	1	1	1
92			Rhinolophus chiewkweeae	0	0	0	0	1
93			Rhinolophus coelophylus	1	0	0	0	0
94			Rhinolophus lepidus	1	1	1	1	1
95			Rhinolophus luctus	1	1	1	1	1
96			Rhinolophus macrotis	1	0	0	0	0
97			Rhinolophus pusillus	0	0	0	1	1
98			Rhinolophus refulgens	1	0	0	0	0
99			Rhinolophus robinsoni	1	0	0	0	1
100			Rhinolophus sedulus	1	1	0	1	1
101			Rhinolophus stheno	1	0	1	1	1
102			Rhinolophus trifoliatus	1	1	1	1	0
103		Vespertilionidae	Eptesicus circumdatus	1	0	0	0	0
104			Glischropus tylopus	1	1	0	1	1
105			Harpiocephalus mordax	0	0	1	0	0
106			Hesperoptenus blanfordi	1	0	0	1	0
107			Hesperoptenus doriae	1	0	0	0	0
108			Hessperoptenus tomesi	1	0	0	0	0
109			Kerivoula hardwickii	1	0	1	1	1
110			Kerivoula intermedia	1	0	1	1	1
111			Kerivoula krauensis	0	0	0	0	1
112			Kerivoula minuta	1	1	1	1	1
113			Kerivoula papillosa	1	1	1	1	1
114			Kerivoula pellucida	1	1	1	1	1
115			Kerivoula picta	0	0	0	1	0
116			Miniopterus fuliginosus	0	0	0	1	0
117			Miniopterus midius	0	0	0	1	0
118			Miniopterus ridleyi	0	0	0	0	1
119			Miniopterus schreibersii	1	0	1	0	1
120			Murina aenea	1	0	1	0	0
121			Murina cyclotis	1	1	1	1	1
122			Murina peninsularis	1	0	0	0	0
123			Murina rozendalii	0	0	0	0	1
124			Murina suilla	1	1	1	1	1
125			Myotis adversus	0	0	0	1	0
126			Myotis ater	0	0	0	0	1
127			Myotis hermanni	0	0	1	0	0
128			Myotis horsefieldii	1	0	1	1	1
129			Myotis montivagus	1	0	1	0	0
130			Myotis muricola	1	0	0	1	1
131			Myotis muricola		0	1	0	0
132			Myotis mystacinus	0	1	0	0	1
133			Myotis ridleyi	1	0	1	1	1
134			Myotis siligorensis	0	0	0	0	1
135			Philetor brachypterus	1	0	0	1	1
136			Phoniscus atrox			1
137			Phoniscus atrox	1	0	1	1	0
138			Phoniscus jagorii	0	0	0	0	1
139			Pipistrellus javanicus	1	0	0	1	0
140			Pipistrellus stenopterus	1	0	0	1	0
141			Pipistrellus tenuis	1	0	0	1	0
142			Scotophilus kuhlii	1	0	0	1	1
143			Tylonycteris pachypus	1	0	1	1	1
144			Tylonycteris robustula	1	0	1	1	1
145		Emballonuridae	Emballonura monticola	1	1	1	1	1
146			Saccolaimus saccolaimus	0	0	0	1	0
147			Taphozous melanopogon	1	0	0	1	0
148			Taphozous saccolainus	1	0	0	0	0
149		Megadermatidae	Megaderma lyra	1	0	0	1	1
150			Megaderma spasma	1	0	1	1	1
151		Molossidae	Chaerephon johorensis	0	0	0	0	1
153			Cheiromeles torquatus	1	0	1	1	0
154			Tadarida johorensis	0	0	0	1	0
155			Tadarida plicata	0	0	0	1	0
TOTAL				113	60	78	105	74

## Sheet: Sheet2
		Selangor State Park		1	1	1	1	1	1	1	1	1	1	0	1	0	1	0	0	1	1	1	1	1	0	1	1	1	1	1	1	1	1	1	1		1	1	1	1	0	1	0	1	1	1	1	0	1
		Taman Negara National Park		1	1	0	1	1	0	1	1	1	1	0	1	0	0	1	1	1	1	1	1	1	0	1	1	0	1	0	0	1	0	1	1	0	0	1	0	0	0	0	1	0	1	1	1	1	0
		Gunung Stong State Park		0	0	0	0	0	0	1	1	1	1	0	1	0	0	0	0	0	0	1	1	0	0	1	0	0	0	0	0	0	0	0	0	0	0	0	0	0	0	0	0	0	0	0	0	0	0
		Royal Belum, Perak		1	1	0	1	1	0	1	1	1	1	0	0	1	0	0	0	1	1	1	1	0	1	1	1	1	1	1	1	1	0	1	1	1	1	1	0	0	0	1	0	1	1	1	0	1	0
		Endau-Rompin State Park		1	1	0	1	1	1	1	1	1	1	1	1	0	1	1	1	1	1	1	1	0	0	1	1	1	1	1	1	1	1	1	1		0	0	1	0	1	0	1	1	1	1	1	1	1
		Hulu Terengganu, Terengganu		0	0	0	0	0	0	1	1	1	1	0	1	0	0	1	0	1	0	1	1	1	0	0	1	1	1	0	1	0	0	0	1		0	0	0	0	0	0	0	0	1	0	0	0	0
				Echinosorex gymnura	Hylomys suillus	Bandicota indica	Berylmys bowersi	Chiropodamys gliroides	Lenothris canus	Leopoldamys sabanus	Maxomys rajah	Maxomys surifer	Maxomys whiteheadi	Mus musculus	Niviventer cremoriventer	Niviventer cremoriventer	Pithecheir parvus	Rattus annandalei	Rattus argentiventer	Rattus exulans	Rattus rattus	Rattus tiomanicus	Sundamys muelleri	Callosciurus caniceps	Callosciurus erythraeus	Callosciurus nigrovittatus	Callosciurus notatus	Callosciurus presvostii	Lariscus insignis	Ratufa affinis	Ratufa bicolor	Rhinosciurus laticaudatus	Sundasciurus hippurus	Sundasciurus lowii	Sundasciurus tenuis	Tamiops macclellandii	Chimarogale himalayica	Crocidura fuliginosa	Crocidura malayana	Crocidura monticola	Crocidura negligens	Suncus etruscus	Suncus murinus	Ptilocercus lowii	Tupaia glis	Tupaia minor	Aeromys tehphromelas	Hylopetes platyurus	Hylopetes spadiceus
[truncated: 105 more columns]
